# Supplementary material for: A Novel Insecticidal Peptide SLP1 Produced by Streptomyces laindensis H008 against Lipaphis erysimi
Source: MDPI journal article supplement (doi:10.3390/molecules21081101), 2016-08-22
Supplement: s1 [file s1]

# Supplementary Materials: A Novel Insecticidal Peptide SLP1 Produced by *Streptomyces laidensis* H008 against *Lipaphis erysimi*

Lijian Xu, Kangkang Liang, Bensha Duan, Mengdi Yu, Wei Meng, Qinggui Wang and Qiong Yu

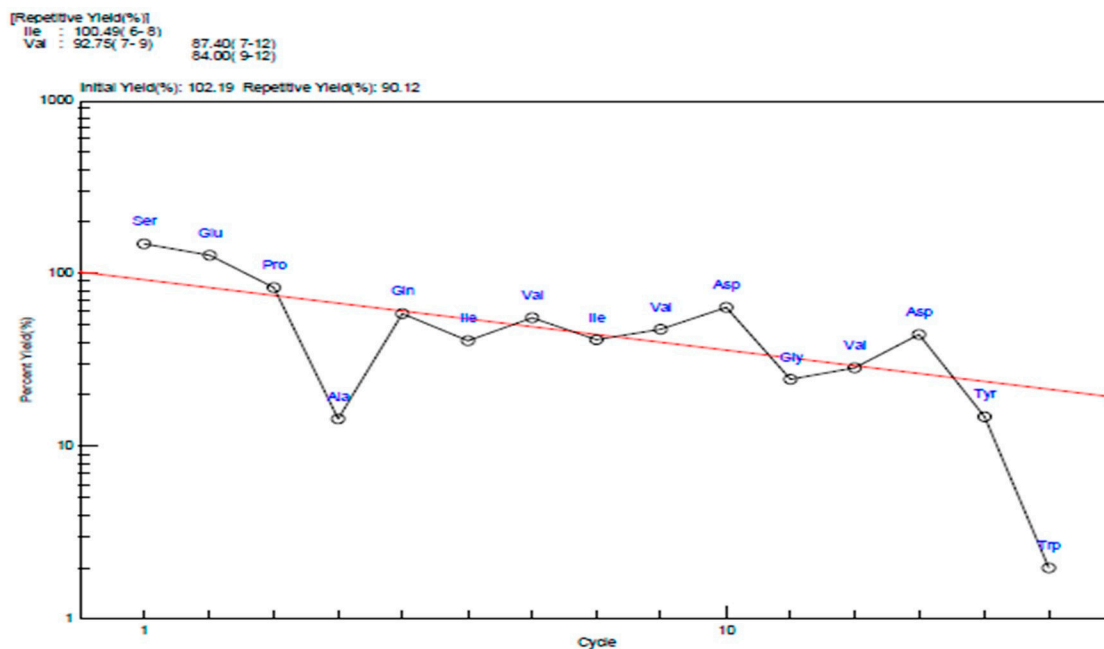

Figure S1. The amino acid sequence analysis of peptide SLP1.
